# Supplementary material for: Extrahepatic metabolism of ibrutinib
Source: PubMed Central journal article supplement (PMC7851014; doi:10.1007/s10637-020-00970-x), 2020-07-04
Supplement: 10637_2020_970_MOESM1_ESM.pdf [file 10637_2020_970_MOESM1_ESM.pdf]

## **Extrahepatic metabolism of ibrutinib**

Johannes J.M. Rood, Amer Jamalpoor, Stephanie van Hoppe, Matthijs J. van Haren, Roeland E. Wasmann, Manoe J. Janssen, Alfred H. Schinkel, Rosalinde Masereeuw, Jos H. Beijnen, Rolf W. Sparidans

## **Supplemental Tables**

**Supplemental Table 1:** Patient data for 24 samples of 2 patients (A and B) for ibrutinib, DHI, IGSH, ICGS, and ICYS.

| Index | Patient | Sample ID | T (h) | Dose       | Group        | Analyte | Concentration (nM) |
|-------|---------|-----------|-------|------------|--------------|---------|--------------------|
| 1     | A       | 5         | 0.5   | 1xdd 420mg | abs          | ibru    | 11.8               |
| 2     | A       | 3         | 0.8   | 1xdd 560mg | abs          | ibru    | 3.5                |
| 3     | A       | 21        | 0.8   | 1xdd 420mg | abs          | ibru    | 143.2              |
| 4     | A       | 6         | 0.8   | 1xdd 420mg | abs          | ibru    | 14.6               |
| 5     | A       | 18        | 1.2   | 1xdd 420mg | abs          | ibru    | 117.5              |
| 6     | A       | 2         | 1.4   | 1xdd 420mg | abs          | ibru    | 6.6                |
| 7     | A       | 16        | 1.5   | 1xdd 420mg | abs          | ibru    | 11.6               |
| 8     | B       | 12        | 2.4   | 1xdd 560mg | max          | ibru    | 551.2              |
| 9     | A       | 13        | 2.5   | 1xdd 420mg | max          | ibru    | 683.1              |
| 10    | B       | 4         | 2.8   | 1xdd 560mg | max          | ibru    | 234.3              |
| 11    | B       | 1         | 3.3   | 1xdd 560mg | max          | ibru    | 309.2              |
| 12    | A       | 14        | 3.8   | 1xdd 420mg | max          | ibru    | 151.2              |
| 13    | B       | 20        | 3.8   | 1xdd 560mg | max          | ibru    | 195.7              |
| 14    | B       | 17        | 3.9   | 1xdd 560mg | max          | ibru    | 578.0              |
| 15    | B       | 23        | 4.1   | 1xdd 560mg | max          | ibru    | 497.1              |
| 16    | B       | 7         | 4.1   | 1xdd 560mg | max          | ibru    | 359.7              |
| 17    | B       | 24        | 4.4   | 1xdd 560mg | max          | ibru    | 323.2              |
| 18    | B       | 9         | 4.4   | 1xdd 560mg | max          | ibru    | 192.3              |
| 19    | A       | 10        | 22.2  | 1xdd 420mg | trough       | ibru    | 7.0                |
| 20    | A       | 11        | 22.6  | 1xdd 420mg | trough       | ibru    | 4.3                |
| 21    | A       | 8         | 22.7  | 1xdd 420mg | trough       | ibru    | 8.9                |
| 22    | A       | 19        | 23.3  | 1xdd 420mg | trough       | ibru    | 5.5                |
| 23    | A       | 15        | NA    | 1xdd 420mg | <sup>a</sup> | ibru    | 15.8               |
| 24    | A       | 22        | NA    | 1xdd 420mg | <sup>a</sup> | ibru    | 0.9                |
| 25    | A       | 5         | 0.5   | 1xdd 420mg | abs          | dhi     | 51.6               |
| 26    | A       | 3         | 0.8   | 1xdd 560mg | abs          | dhi     | 17.5               |
| 27    | A       | 21        | 0.8   | 1xdd 420mg | abs          | dhi     | 188.2              |
| 28    | A       | 6         | 0.8   | 1xdd 420mg | abs          | dhi     | 48.3               |
| 29    | A       | 18        | 1.2   | 1xdd 420mg | abs          | dhi     | 137.1              |
| 30    | A       | 2         | 1.4   | 1xdd 420mg | abs          | dhi     | 43.9               |
| 31    | A       | 16        | 1.5   | 1xdd 420mg | abs          | dhi     | 24.0               |
| 32    | B       | 12        | 2.4   | 1xdd 560mg | max          | dhi     | 449.9              |
| 33    | A       | 13        | 2.5   | 1xdd 420mg | max          | dhi     | 403.7              |
| 34    | B       | 4         | 2.8   | 1xdd 560mg | max          | dhi     | 345.6              |
| 35    | B       | 1         | 3.3   | 1xdd 560mg | max          | dhi     | 419.9              |
| 36    | A       | 14        | 3.8   | 1xdd 420mg | max          | dhi     | 195.3              |
| 37    | B       | 20        | 3.8   | 1xdd 560mg | max          | dhi     | 524.1              |
| 38    | B       | 17        | 3.9   | 1xdd 560mg | max          | dhi     | 542.0              |
| 39    | B       | 23        | 4.1   | 1xdd 560mg | max          | dhi     | 468.0              |

|    |   |    |      |            |              |      |       |
|----|---|----|------|------------|--------------|------|-------|
| 40 | B | 7  | 4.1  | 1xdd 560mg | max          | dhi  | 523.3 |
| 41 | B | 24 | 4.4  | 1xdd 560mg | max          | dhi  | 484.1 |
| 42 | B | 9  | 4.4  | 1xdd 560mg | max          | dhi  | 393.3 |
| 43 | A | 10 | 22.2 | 1xdd 420mg | trough       | dhi  | 90.7  |
| 44 | A | 11 | 22.6 | 1xdd 420mg | trough       | dhi  | 45.3  |
| 45 | A | 8  | 22.7 | 1xdd 420mg | trough       | dhi  | 86.6  |
| 46 | A | 19 | 23.3 | 1xdd 420mg | trough       | dhi  | 30.5  |
| 47 | A | 15 | NA   | 1xdd 420mg | <sup>a</sup> | dhi  | 59.3  |
| 48 | A | 22 | NA   | 1xdd 420mg | <sup>a</sup> | dhi  | <LLOQ |
| 49 | A | 5  | 0.5  | 1xdd 420mg | abs          | igsh | <LLOQ |
| 50 | A | 3  | 0.8  | 1xdd 560mg | abs          | igsh | 0.5   |
| 51 | A | 21 | 0.8  | 1xdd 420mg | abs          | igsh | <LLOQ |
| 52 | A | 6  | 0.8  | 1xdd 420mg | abs          | igsh | <LLOQ |
| 53 | A | 18 | 1.2  | 1xdd 420mg | abs          | igsh | <LLOQ |
| 54 | A | 2  | 1.4  | 1xdd 420mg | abs          | igsh | <LLOQ |
| 55 | A | 16 | 1.5  | 1xdd 420mg | abs          | igsh | <LLOQ |
| 56 | B | 12 | 2.4  | 1xdd 560mg | max          | igsh | 0.8   |
| 57 | A | 13 | 2.5  | 1xdd 420mg | max          | igsh | 1.5   |
| 58 | B | 4  | 2.8  | 1xdd 560mg | max          | igsh | 3.5   |
| 59 | B | 1  | 3.3  | 1xdd 560mg | max          | igsh | 2.6   |
| 60 | A | 14 | 3.8  | 1xdd 420mg | max          | igsh | 0.5   |
| 61 | B | 20 | 3.8  | 1xdd 560mg | max          | igsh | 0.8   |
| 62 | B | 17 | 3.9  | 1xdd 560mg | max          | igsh | 1.9   |
| 63 | B | 23 | 4.1  | 1xdd 560mg | max          | igsh | 2.2   |
| 64 | B | 7  | 4.1  | 1xdd 560mg | max          | igsh | 1.5   |
| 65 | B | 24 | 4.4  | 1xdd 560mg | max          | igsh | 1.4   |
| 66 | B | 9  | 4.4  | 1xdd 560mg | max          | igsh | 0.8   |
| 67 | A | 10 | 22.2 | 1xdd 420mg | trough       | igsh | <LLOQ |
| 68 | A | 11 | 22.6 | 1xdd 420mg | trough       | igsh | <LLOQ |
| 69 | A | 8  | 22.7 | 1xdd 420mg | trough       | igsh | <LLOQ |
| 70 | A | 19 | 23.3 | 1xdd 420mg | trough       | igsh | <LLOQ |
| 71 | A | 15 | NA   | 1xdd 420mg | <sup>a</sup> | igsh | <LLOQ |
| 72 | A | 22 | NA   | 1xdd 420mg | <sup>a</sup> | igsh | <LLOQ |
| 73 | A | 5  | 0.5  | 1xdd 420mg | abs          | icgs | 5.4   |
| 74 | A | 3  | 0.8  | 1xdd 560mg | abs          | icgs | 9.7   |
| 75 | A | 21 | 0.8  | 1xdd 420mg | abs          | icgs | 11.9  |
| 76 | A | 6  | 0.8  | 1xdd 420mg | abs          | icgs | 7.3   |
| 77 | A | 18 | 1.2  | 1xdd 420mg | abs          | icgs | 11.1  |
| 78 | A | 2  | 1.4  | 1xdd 420mg | abs          | icgs | 6.7   |
| 79 | A | 16 | 1.5  | 1xdd 420mg | abs          | icgs | 2.2   |
| 80 | B | 12 | 2.4  | 1xdd 560mg | max          | icgs | 73.2  |
| 81 | A | 13 | 2.5  | 1xdd 420mg | max          | icgs | 412.5 |

|     |   |    |      |            |              |      |        |
|-----|---|----|------|------------|--------------|------|--------|
| 82  | B | 4  | 2.8  | 1xdd 560mg | max          | icgs | 159.9  |
| 83  | B | 1  | 3.3  | 1xdd 560mg | max          | icgs | 97.1   |
| 84  | A | 14 | 3.8  | 1xdd 420mg | max          | icgs | 72.5   |
| 85  | B | 20 | 3.8  | 1xdd 560mg | max          | icgs | 78.0   |
| 86  | B | 17 | 3.9  | 1xdd 560mg | max          | icgs | 226.1  |
| 87  | B | 23 | 4.1  | 1xdd 560mg | max          | icgs | 238.6  |
| 88  | B | 7  | 4.1  | 1xdd 560mg | max          | icgs | 190.9  |
| 89  | B | 24 | 4.4  | 1xdd 560mg | max          | icgs | 160.2  |
| 90  | B | 9  | 4.4  | 1xdd 560mg | max          | icgs | 88.1   |
| 91  | A | 10 | 22.2 | 1xdd 420mg | trough       | icgs | 3.7    |
| 92  | A | 11 | 22.6 | 1xdd 420mg | trough       | icgs | 3.0    |
| 93  | A | 8  | 22.7 | 1xdd 420mg | trough       | icgs | 5.6    |
| 94  | A | 19 | 23.3 | 1xdd 420mg | trough       | icgs | 0.6    |
| 95  | A | 15 | NA   | 1xdd 420mg | <sup>a</sup> | icgs | 5.1    |
| 96  | A | 22 | NA   | 1xdd 420mg | <sup>a</sup> | icgs | <LLOQ  |
| 97  | A | 5  | 0.5  | 1xdd 420mg | abs          | icys | 5.1    |
| 98  | A | 3  | 0.8  | 1xdd 560mg | abs          | icys | 3.9    |
| 99  | A | 21 | 0.8  | 1xdd 420mg | abs          | icys | 12     |
| 100 | A | 6  | 0.8  | 1xdd 420mg | abs          | icys | 5.6    |
| 101 | A | 18 | 1.2  | 1xdd 420mg | abs          | icys | 9.9    |
| 102 | A | 2  | 1.4  | 1xdd 420mg | abs          | icys | 5.0    |
| 103 | A | 16 | 1.5  | 1xdd 420mg | abs          | icys | 2.3    |
| 104 | B | 12 | 2.4  | 1xdd 560mg | max          | icys | 209.5  |
| 105 | A | 13 | 2.5  | 1xdd 420mg | max          | icys | 185.8  |
| 106 | B | 4  | 2.8  | 1xdd 560mg | max          | icys | 92.8   |
| 107 | B | 1  | 3.3  | 1xdd 560mg | max          | icys | 77.1   |
| 108 | A | 14 | 3.8  | 1xdd 420mg | max          | icys | 32.1   |
| 109 | B | 20 | 3.8  | 1xdd 560mg | max          | icys | 78.7   |
| 110 | B | 17 | 3.9  | 1xdd 560mg | max          | icys | 143.4  |
| 111 | B | 23 | 4.1  | 1xdd 560mg | max          | icys | 194.3  |
| 112 | B | 7  | 4.1  | 1xdd 560mg | max          | icys | 170.3  |
| 113 | B | 24 | 4.4  | 1xdd 560mg | max          | icys | 210.5  |
| 114 | B | 9  | 4.4  | 1xdd 560mg | max          | icys | 89.2   |
| 115 | A | 10 | 22.2 | 1xdd 420mg | trough       | icys | 5.0    |
| 116 | A | 11 | 22.6 | 1xdd 420mg | trough       | icys | 4.7    |
| 117 | A | 8  | 22.7 | 1xdd 420mg | trough       | icys | 6.4    |
| 118 | A | 19 | 23.3 | 1xdd 420mg | trough       | icys | 2.6    |
| 119 | A | 15 | NA   | 1xdd 420mg | <sup>a</sup> | icys | 12.1   |
| 120 | A | 22 | NA   | 1xdd 420mg | <sup>a</sup> | icys | < LLOQ |

---

<sup>a</sup> omitted (no group)

**Supplemental Table 2:** Concomitant drugs for the 73 yr. old patient receiving a lowered dose due to co-administration of a potent CYP3A4-inhibitor.

| Drug                                                      | DD         | Dose      | Route   | Inhibits                             | Metabolism                                         |
|-----------------------------------------------------------|------------|-----------|---------|--------------------------------------|----------------------------------------------------|
| Clemastine                                                | 2          | 1 mg      | IV      | CYP2D6                               | -                                                  |
| Cyanocobalamin                                            | 1          | 6 mg      | n.g.    | -                                    | -                                                  |
| Enteral feeding                                           | continuous | -         | n.g.    | -                                    | -                                                  |
| Furosemide                                                | continuous | 2 mg/h    | IV      | -                                    | -                                                  |
| Glucose 5%                                                | continuous | 42 ml/h   | IV      | -                                    | -                                                  |
| Haloperidol                                               | 1          | 1 mg      | IV      | CYP2D6                               | <b>CYP3A4</b>                                      |
| Ibrutinib                                                 | 1          | 140 mg    | n.g.    | -                                    | <b>CYP3A4,</b><br>2D6                              |
| Macrogol                                                  | 2          | 2 sachets | n.g.    | -                                    | -                                                  |
| Magnesium sulphate                                        | 1          | 15 mg     | n.g.    | -                                    | -                                                  |
| Metoclopramide                                            | 3          | 10 mg     | IV      | -                                    | <i>CYP2D6</i>                                      |
| Midazolam                                                 | continuous | 10 mg/h   | IV      | -                                    | <b>CYP3A4</b>                                      |
| Monosodium phosphate                                      | continuous | 2 mmol/h  | IV      | -                                    | -                                                  |
| Nadroparin                                                | 1          | 2850 IE   | SC      | -                                    | -                                                  |
| Parenteral nutrition                                      | continuous | 84 ml     | IV      | -                                    | -                                                  |
| Propofol                                                  | continuous | 100 mg/h  | IV      | -                                    | -                                                  |
| Salbutamol/ipratropium<br>1/0,2mg/ml                      | 1-2        | 2.5 ml    | IH      | -                                    | -                                                  |
| Sufentanil                                                | continuous | 10 µg/h   | IV      | -                                    | <i>CYP3A4</i>                                      |
| Tobramycin/colistin/<br>amphotericin B oral paste         | 4          | 1 g       | Oral    | -                                    | -                                                  |
| Tobramycin/colistin/<br>amphotericin B oral<br>suspension | 4          | 10 mL     | n.g.    | -                                    | -                                                  |
| Voriconazole                                              | 2          | 340 mg    | IV (1h) | <u>CYP3A4,</u><br>CYP2C9,<br>CYP2C19 | <b>CYP3A4,</b><br><b>CYP2C9,</b><br><b>CYP2C19</b> |

DD: number of daily doses, IH: inhaled (after nebulizing), IV: intravenous, n.g.: nasogastric tube, SC: sub-cutaneous, **BOLD**: relevant interaction by strong inhibitors of that enzyme\*, *italicized*: deemed not-relevant\* Underlined: relevant for ibrutinib. (\* Relevance as evaluated by the Royal Dutch Pharmacists Association (kennisbank.knmp.nl, visited 17-06-2018)).
